# Supplementary material for: Die nächste Generation der Allgemeinmedizin
Source: Springer Nature journal article supplement (doi:10.1007/s44266-023-00114-3), 2023-10-16

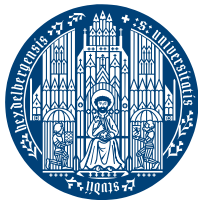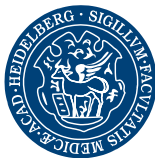

UniversitätsKlinikum Heidelberg

## Evaluation der KWBW Verbundweiterbildung<sup>plus</sup> Eine Kohortenstudie über das strukturierte Weiterbildungsprogramm

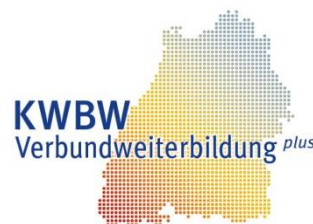

### Eingangsfragebogen

Befragung von Ärztinnen und Ärzten bei Eintritt in die KWBW Verbundweiterbildung<sup>plus</sup>

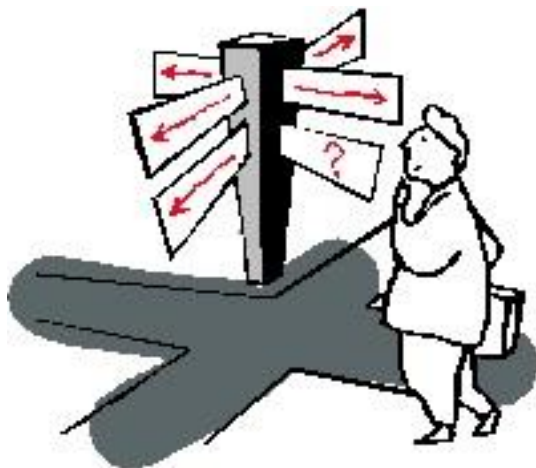

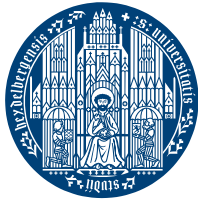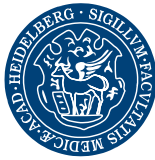

## Evaluation der KWBW Verbundweiterbildung<sup>plus</sup> - Kohortenstudie

Liebe Ärztinnen und Ärzte in Weiterbildung,

herzlich willkommen in der KWBW Verbundweiterbildung<sup>plus</sup>! Zu Beginn eurer Teilnahme an diesem Programm möchten wir euch zu eurer bisherigen Weiterbildung und euren Zukunftsvorstellungen befragen und bitten euch den folgenden Eingangsfragebogen vollständig auszufüllen. Die Befragung stellt den Auftakt einer Kohortenstudie dar. Das bedeutet, dass wir euch bis zu eurer Facharztprüfung in größeren, regelmäßigen Abständen (circa 1x/Jahr) zu euren Erfahrungen sowie eurer persönlichen und beruflichen Entwicklung befragen möchten. Der Sinn ist mehr über Ärztinnen und Ärzte in Weiterbildung zu erfahren, um die Weiterbildung und das Angebot der Verbundweiterbildung<sup>plus</sup> fortlaufend zu verbessern. Die Informationen nutzen wir auch, um Veränderungswünsche von euch aufzunehmen. Die Teilnahme erfolgt freiwillig. Die Einwilligung kann jederzeit ohne Angabe von Gründen zurückgezogen werden.

Die erhobenen Daten werden unter Berücksichtigung der Bestimmungen des Datenschutzgesetzes in pseudonymisierter\* Form, d.h. ohne direkten Bezug zu eurem Namen, elektronisch gespeichert und ausgewertet. Zugriff auf die erhobenen Daten haben nur Mitarbeiter der Studie, die zur Verschwiegenheit verpflichtet sind. Dritte erhalten keinen Einblick in Originalunterlagen, die Einverständniserklärung wird separat aufbewahrt. Bei der Veröffentlichung von Ergebnissen dieser Studie ist kein Rückschluss auf eure Person möglich. Nach Beendigung der Studie werden die Daten entsprechend gesetzlicher Bestimmungen gelöscht.

[\*Pseudonymisieren (nach BDSG §3 Abs.6a) ist das Ersetzen des Namens und anderer Identifikationsmerkmale durch ein Kennzeichen zu dem Zweck, die Bestimmung des Betroffenen auszuschließen oder wesentlich zu erschweren.]

Bei weiteren Fragen zur Studie stehen euch **Dr. Simon Schwill** ([simon.schwill@med.uni-heidelberg.de](mailto:simon.schwill@med.uni-heidelberg.de)) und das Team der KWBW Verbundweiterbildung<sup>plus</sup> gerne als Ansprechpartner zur Verfügung.

Mit eurer Unterschrift erklärt ihr euch mit der Teilnahme an der Kohortenstudie einverstanden.

Ort, Datum

Name, Vorname

Unterschrift

Bitte trage hier dein sechstelliges Pseudonym ein.

Erster Buchstabe des  
Vornamens deiner Mutter

Zweiter Buchstabe des  
Vornamens deiner Mutter

Erster Buchstabe  
deines Geburtsorts

Zweiter Buchstabe  
deines Geburtsorts

Tageszahl deines Geburtstages  
(z.B. 7. Oktober 1984 = 07)

1

2

3

3b

4

5

# Kohortenstudie

Bitte trage hier dein sechsstelliges Pseudonym ein.

|                                                 |                                                  |                                        |                                                 |                                                              |
|-------------------------------------------------|--------------------------------------------------|----------------------------------------|-------------------------------------------------|--------------------------------------------------------------|
| Erster Buchstabe des<br>Vornamens deiner Mutter | Zweiter Buchstabe des<br>Vornamens deiner Mutter | Erster Buchstabe<br>deines Geburtsorts | <u>Zweiter Buchstabe<br/>deines Geburtsorts</u> | Tageszahl deines Geburtstages<br>(z.B. 7. Oktober 1984 = 07) |
| 1                                               | 2                                                | 3                                      | 3b                                              | 4 5                                                          |

## Teil 1 - Soziodemographische Daten

| Bitte beantworte folgende Fragen |                                                                                                               | Bitte setze je Frage nur eine Markierung                                                                                                               |                                                 |
|----------------------------------|---------------------------------------------------------------------------------------------------------------|--------------------------------------------------------------------------------------------------------------------------------------------------------|-------------------------------------------------|
| 1                                | Wann bist du geboren?                                                                                         |                                                                                                                                                        | Monat/Jahr<br>(z.B. 05/1986)                    |
| 2                                | Was ist dein Geschlecht?                                                                                      | <input type="checkbox"/> weiblich<br><input type="checkbox"/> männlich                                                                                 |                                                 |
| 3                                | Wie viele Kinder hast du?                                                                                     |                                                                                                                                                        | Anzahl (z.B. 2)                                 |
| 3a                               | Falls du ein oder mehrere Kind(er) hast, wann sind sie geboren?                                               |                                                                                                                                                        | Jahr(e)<br>(z.B. 2010 oder<br>z.B. 2010 / 2012) |
| 4                                | Was ist dein Familienstand?                                                                                   | <input type="checkbox"/> ledig<br><input type="checkbox"/> in fester Partnerschaft<br><input type="checkbox"/> in fester Partnerschaft und verheiratet |                                                 |
| 4a                               | Falls du in einer festen Partnerschaft lebst, was ist der Beruf deines Partners/deiner Partnerin?             | Freitext                                                                                                                                               |                                                 |
| 4b                               | Falls du in einer festen Partnerschaft lebst, was ist der höchste Abschluss deines Partners/deiner Partnerin? | Freitext                                                                                                                                               |                                                 |
| 5                                | In welchem Land bist Du geboren?                                                                              | <input type="checkbox"/> Deutschland<br><input type="checkbox"/> außerhalb von Deutschland:<br>Freitext (z.B. Türkei)                                  |                                                 |
| 6                                | Welche Staatsbürgerschaft(en) besitzt du?                                                                     | <input type="checkbox"/> Deutsch<br><input type="checkbox"/> andere*<br><input type="checkbox"/> Deutsch und andere* (doppelte Staatsbürgerschaft?)    |                                                 |
| 6a                               | Falls du eine andere Staatsbürgerschaft als die deutsche oder weitere besitzt, welche?                        | Freitext                                                                                                                                               |                                                 |

| Bitte beantworte folgende Fragen |                                                                                                                                            | Bitte setze je Frage nur eine Markierung                                                                                                                                                                                                                               |                           |
|----------------------------------|--------------------------------------------------------------------------------------------------------------------------------------------|------------------------------------------------------------------------------------------------------------------------------------------------------------------------------------------------------------------------------------------------------------------------|---------------------------|
| 7                                | Sind deine Eltern in Deutschland geboren?                                                                                                  | <input type="checkbox"/> beide Elternteile in Deutschland geboren<br><input type="checkbox"/> ein Elternteil <u>nicht</u> in Deutschland geboren<br><input type="checkbox"/> beide Elternteile <u>nicht</u> in Deutschland geboren                                     |                           |
| 8                                | Wie viele Einwohner hat der Ort, in dem du (überwiegend) <u>aufgewachsen</u> bist?                                                         | <input type="checkbox"/> >100.000 Einwohner (Großstadt)<br><input type="checkbox"/> 20.001 - 100.000 Einwohner<br><input type="checkbox"/> 10.001 - 20.000 Einwohner<br><input type="checkbox"/> 5.000 - 10.000 Einwohner<br><input type="checkbox"/> <5.000 Einwohner |                           |
| 9                                | Wie weit ist circa die Distanz von dem Ort, in dem du (überwiegend) <u>aufgewachsen</u> bist, zur nächsten Großstadt (>100.000 Einwohner)? | <input type="checkbox"/> Mein Heimatort <sup>1)</sup> ist eine Großstadt<br><input type="checkbox"/> <10 Kilometer<br><input type="checkbox"/> 10-35 Kilometer<br><input type="checkbox"/> >35 Kilometer                                                               |                           |
| 10                               | Wie viele Einwohner hat dein <u>aktueller Hauptwohnsitz</u> ?                                                                              | <input type="checkbox"/> >100.000 Einwohner (Großstadt)<br><input type="checkbox"/> 20.001 - 100.000 Einwohner<br><input type="checkbox"/> 10.001 - 20.000 Einwohner<br><input type="checkbox"/> 5.000 - 10.000 Einwohner<br><input type="checkbox"/> <5.000 Einwohner |                           |
| 11                               | Wie weit ist circa die Distanz von deinem <u>aktuellen Hauptwohnsitz</u> bis zur nächsten Großstadt (>100.000 Einwohner)?                  | <input type="checkbox"/> Mein aktueller Wohnsitz ist eine Großstadt<br><input type="checkbox"/> <10 Kilometer<br><input type="checkbox"/> 10-35 Kilometer<br><input type="checkbox"/> >35 Kilometer                                                                    |                           |
| 12                               | Wann hast du die Schule mit Abitur bzw. (allg.) Hochschulreife abgeschlossen?                                                              |                                                                                                                                                                                                                                                                        | Jahr<br>(z.B. 2002)       |
| 13                               | Wie war deine Abschlussnote?<br>(Anmerkung: bei Auslandsabschluss bitte Notenskala dazu angeben)                                           |                                                                                                                                                                                                                                                                        | Note<br>(z.B. Abitur 1.7) |
| 14                               | In welchem (Bundes)Land hast du das Abitur bzw. deine (allg.) Hochschulreife bestanden?                                                    | <i>Freitext (z.B. Bremen, aber auch Griechenland)</i>                                                                                                                                                                                                                  |                           |

1) „Heimatort“ = Ort in dem du (überwiegend) aufgewachsen bist

| Teil 2 – Medizinstudium          |                                                                                                          |                                                                                                                                              |                                         |
|----------------------------------|----------------------------------------------------------------------------------------------------------|----------------------------------------------------------------------------------------------------------------------------------------------|-----------------------------------------|
| Bitte beantworte folgende Fragen |                                                                                                          | Bitte setze je Frage nur eine Markierung                                                                                                     |                                         |
| 15                               | In welchem Jahr hast du das Medizinstudium <u>begonnen</u> ?                                             |                                                                                                                                              | Jahr (z.B. 2003)                        |
| 16                               | An welcher medizinischen Fakultät hast du das Medizinstudium begonnen?                                   |                                                                                                                                              | Ort (z.B. Frankfurt a.M. oder Bukarest) |
| 17                               | In welchem Jahr hast du das Medizinstudium abgeschlossen?                                                |                                                                                                                                              | Jahr (z.B. 2010)                        |
| 18                               | In welchem Jahr hast du deine Approbation (für Deutschland) erhalten?                                    |                                                                                                                                              | Jahr (z.B. 2010)                        |
| 19                               | An welcher medizinischen Fakultät hast du das Medizinstudium abgeschlossen?                              |                                                                                                                                              | Ort (z.B. Frankfurt a.M. oder Bukarest) |
| 20                               | Was war die Abschlussnote deines Medizinstudiums?                                                        |                                                                                                                                              | Note(z.B. 2.15)                         |
| 21                               | Hast Du einen Teil deines Studiums im Ausland absolviert (z.B. Famulatur, PJ Tertial, Auslandssemester)? | <input type="checkbox"/> nein<br><input type="checkbox"/> ja                                                                                 |                                         |
| 21a                              | Falls du einen Teil deines Studiums im Ausland absolviert hast, wo?                                      | <i>Freitext (z. B. Südafrika)</i>                                                                                                            |                                         |
| 22                               | Hast du jemals eine Promotion zum Dr.med. begonnen?                                                      | <input type="checkbox"/> nein, niemals<br><input type="checkbox"/> ja, einmal<br><input type="checkbox"/> ja, mehrfach                       |                                         |
| 22a                              | Falls ja, in welchem Jahr hast du deine (letzte) Promotion zum Dr.med. begonnen?                         |                                                                                                                                              | Jahr (z.B. 2007)                        |
| 22b                              | Falls ja, hast du deine Promotion zum Dr.med. abgeschlossen?                                             | <input type="checkbox"/> nein, ich habe sie abgebrochen<br><input type="checkbox"/> nein, ich promoviere noch<br><input type="checkbox"/> ja |                                         |
| 22c                              | Falls du deine Promotion zum Dr.med. abgeschlossen hast, wann?                                           |                                                                                                                                              | Jahr (z.B. 2011)                        |

| Teil 3 – Weitere Qualifikationen |                                                                                                                                                      |                                                                                                                                                                                                          |
|----------------------------------|------------------------------------------------------------------------------------------------------------------------------------------------------|----------------------------------------------------------------------------------------------------------------------------------------------------------------------------------------------------------|
| Bitte beantworte folgende Fragen |                                                                                                                                                      | Bitte setze je Frage nur eine Markierung                                                                                                                                                                 |
| 23                               | Hast du jemals eine Berufsausbildung <u>abgeschlossen</u> ?                                                                                          | <input type="checkbox"/> nein<br><input type="checkbox"/> nein, abgebrochen für das Medizinstudium<br><input type="checkbox"/> ja, und zwar folgende<br><i>Freitext (Fachrichtung und Abschlussjahr)</i> |
| 24                               | Hast du – außer dem Medizinstudium – jemals einen anderen Studiengang (ggf. auch mehrere) <u>abgeschlossen</u> ?                                     | <input type="checkbox"/> nein<br><input type="checkbox"/> ja, und zwar folgende(n)<br><i>Freitext (Fachrichtung und Abschlussjahr)</i>                                                                   |
| 25                               | Hast du nach dem Abschluss des Medizinstudiums einen Aufbaustudiengang (=postgraduierten Studiengang, ggf. auch mehrere) <u>begonnen</u> ?           | <input type="checkbox"/> nein<br><input type="checkbox"/> ja, und zwar folgende(n)<br><i>Freitext (z.B. Gesundheitsökonomie)</i>                                                                         |
| 25a                              | Hast du nach dem Abschluss des Medizinstudiums einen Aufbaustudiengang (=postgraduierten Studiengang) <u>abgeschlossen</u> ?                         | <input type="checkbox"/> nein, läuft noch<br><input type="checkbox"/> nein, abgebrochen<br><input type="checkbox"/> ja, und zwar folgende(n)<br><i>Freitext (Fachrichtung und Abschlussjahr)</i>         |
| 26                               | Hast du – außer der Promotion zum Dr.med. – in einem anderen Fach eine Promotion <u>abgeschlossen</u> ?                                              | <input type="checkbox"/> nein<br><input type="checkbox"/> ja, und zwar folgende<br><i>Freitext (Titel und Abschlussjahr)</i>                                                                             |
| 27                               | Hast du schon einmal als Autor eine wissenschaftliche Arbeit (medizinisch oder außer-medizinisch) in einem <i>peer-reviewed</i> Journal mitverfasst? | <input type="checkbox"/> nein<br><input type="checkbox"/> ja, als <u>co-Autor</u><br><input type="checkbox"/> ja, als <u>Erst-Autor</u>                                                                  |

| Teil 4 – Weiterbildung           |                                                                                                                                                                |                                                                                                                                                                                                                                                                                                                                                                    |                                                                   |
|----------------------------------|----------------------------------------------------------------------------------------------------------------------------------------------------------------|--------------------------------------------------------------------------------------------------------------------------------------------------------------------------------------------------------------------------------------------------------------------------------------------------------------------------------------------------------------------|-------------------------------------------------------------------|
| Bitte beantworte folgende Fragen |                                                                                                                                                                | Bitte setze je Frage nur eine Markierung                                                                                                                                                                                                                                                                                                                           |                                                                   |
| 28                               | Wann hast du begonnen als Ärztin/Arzt zu arbeiten?                                                                                                             |                                                                                                                                                                                                                                                                                                                                                                    | Jahr (z.B. 2014)                                                  |
| 29                               | Hast du bereits eine Facharztanerkennung erworben?                                                                                                             | <input type="checkbox"/> nein<br><input type="checkbox"/> ja<br>Falls ja, beachte bitte Teil (7) für Quereinsteiger <sup>1</sup> am Ende des Fragebogens!                                                                                                                                                                                                          |                                                                   |
| 30                               | Wieviel Weiterbildungszeit fehlt dir noch, bis du dich zur Facharztprüfung Allgemeinmedizin anmelden kannst?                                                   |                                                                                                                                                                                                                                                                                                                                                                    | (Jahre + Monate in Vollzeitäquivalent, z.B. 3 Jahre und 4 Monate) |
| 31                               | In welchem Umfang arbeitest du derzeit?                                                                                                                        | <input type="checkbox"/> 100% - Anstellung<br><input type="checkbox"/> 75-99% - Anstellung<br><input type="checkbox"/> 51-74% - Anstellung<br><input type="checkbox"/> 50% - Anstellung<br><input type="checkbox"/> ich arbeite zurzeit nicht                                                                                                                      |                                                                   |
| 31a                              | Wenn du zurzeit nicht arbeitest, was ist dein Status?                                                                                                          | <input type="checkbox"/> Mutterschutz / Elternzeit<br><input type="checkbox"/> arbeitslos<br><input type="checkbox"/> sonstiges ( <i>Freitext</i> )                                                                                                                                                                                                                |                                                                   |
| 32                               | Hast du bei Geburt deines Kindes /deiner Kinder Elternzeit genommen?                                                                                           | <input type="checkbox"/> ja<br><input type="checkbox"/> nein                                                                                                                                                                                                                                                                                                       |                                                                   |
| 32a                              | Wenn du bisher Elternzeit genommen hast, wie viele Monate Elternzeit hast du insgesamt seit dem Beginn deiner ärztlichen Tätigkeit (Angabe unter 28) genommen? |                                                                                                                                                                                                                                                                                                                                                                    | Zeit (in Monaten, z.B. 12+14=26 Monate)                           |
| 33                               | In welchem Weiterbildungs-Abschnitt befindest du dich aktuell?                                                                                                 | <input type="checkbox"/> ambulant<br><input type="checkbox"/> stationär                                                                                                                                                                                                                                                                                            |                                                                   |
| 33a                              | Falls du im ambulanten Bereich arbeitest, in welcher Einrichtung?                                                                                              | <input type="checkbox"/> in einer Einzelpraxis<br><input type="checkbox"/> in einer Berufsausübungsgemeinschaft<br><input type="checkbox"/> in einer Praxisgemeinschaft<br><input type="checkbox"/> in einem Medizinischen Versorgungszentrum<br><input type="checkbox"/> in einer Forschungseinrichtung<br><input type="checkbox"/> sonstiges ( <i>Freitext</i> ) |                                                                   |

1 „Quereinstieg“ = Verkürzter Einstieg Allgemeinmedizin.

| Bitte beantworte folgende Fragen |                                                                                                                                                                                                                                                               | Bitte setze je Frage nur eine Markierung                                                                                                                                                                                                                                                                                                                                      |
|----------------------------------|---------------------------------------------------------------------------------------------------------------------------------------------------------------------------------------------------------------------------------------------------------------|-------------------------------------------------------------------------------------------------------------------------------------------------------------------------------------------------------------------------------------------------------------------------------------------------------------------------------------------------------------------------------|
| 34                               | In welchem Fach arbeitest du aktuell?                                                                                                                                                                                                                         | <input type="checkbox"/> Allgemeinmedizin<br><input type="checkbox"/> Innere<br><br><input type="checkbox"/> anderes Fach, und zwar <i>Freitext (z.B. Pädiatrie)</i>                                                                                                                                                                                                          |
| 35                               | Besitz du die Zusatzbezeichnung Notfallmedizin?                                                                                                                                                                                                               | <input type="checkbox"/> ja<br><input type="checkbox"/> nein                                                                                                                                                                                                                                                                                                                  |
| 36                               | Gehst du neben deiner Weiterbildung einer weiteren ärztlichen Nebentätigkeit nach?                                                                                                                                                                            | <input type="checkbox"/> nein<br><br><input type="checkbox"/> ja und zwar<br><i>(Freitext z.B. Notärztin, KV Dienst)</i>                                                                                                                                                                                                                                                      |
| Bitte beantworte folgende Fragen |                                                                                                                                                                                                                                                               | <i>Mehrfachnennung möglich</i>                                                                                                                                                                                                                                                                                                                                                |
| 37                               | <p>In welche Fachgebiete bist du während deiner Weiterbildung <u>bisher</u> rotiert?</p> <p>Mehrfachnennung möglich!</p> <p>Anmerkung für Quereinsteiger:<br/>Bitte gib auch alle Fachgebiet an, in denen du in der ersten Weiterbildung gearbeitet hast.</p> | <input type="radio"/> Allgemeinmedizin<br><input type="radio"/> Innere Medizin<br><input type="radio"/> Anästhesie<br><input type="radio"/> Chirurgie<br><input type="radio"/> Dermatologie<br><input type="radio"/> Gynäkologie und Geburtshilfe<br><input type="radio"/> Neurologie<br><input type="radio"/> Pädiatrie<br><input type="radio"/> weitere ( <i>Freitext</i> ) |

## Teil 5 – Zukunftsplanung für die Weiterbildung

| Bitte beantworte folgende Fragen |                                                                                                                                                                          | Bitte setze je Frage nur eine Markierung                                                                                                                                                                                                                               |                               |
|----------------------------------|--------------------------------------------------------------------------------------------------------------------------------------------------------------------------|------------------------------------------------------------------------------------------------------------------------------------------------------------------------------------------------------------------------------------------------------------------------|-------------------------------|
| 38                               | In welchem Jahr wirst du unter Berücksichtigung deiner persönlichen Planung (Kinder, Weltreise etc.) voraussichtlich dein Facharztgespräch für Allgemeinmedizin ablegen? |                                                                                                                                                                                                                                                                        | Jahr i.d. Zukunft (z.B. 2019) |
| 39                               | Würdest du gerne einen Teil deiner Weiterbildung Allgemeinmedizin in einer Landarztpraxis absolvieren?                                                                   | <input type="checkbox"/> nein<br><input type="checkbox"/> ja                                                                                                                                                                                                           |                               |
| 40                               | An wie vielen hausärztlichen Weiterbildungsstellen möchtest du dich weiterbilden?                                                                                        | <input type="checkbox"/> eine Weiterbildungsstelle<br><input type="checkbox"/> zwei Weiterbildungsstellen<br><input type="checkbox"/> >2 Weiterbildungsstellen                                                                                                         |                               |
| 41                               | In welchem Umfang möchtest du deine <u>ambulante</u> Weiterbildung in Allgemeinmedizin <u>hauptsächlich</u> durchführen?                                                 | <input type="checkbox"/> 100% -Anstellung<br><input type="checkbox"/> 75-99% -Anstellung<br><input type="checkbox"/> 51-74% -Anstellung<br><input type="checkbox"/> 50% -Anstellung<br><i>ggf. Begründung im Freitext (Stichworte)</i>                                 |                               |
| 42                               | Wie groß soll der Ort sein in dem deine <u>hausärztliche Weiterbildungsstelle</u> liegt?                                                                                 | <input type="checkbox"/> >100.000 Einwohner (Großstadt)<br><input type="checkbox"/> 20.001 - 100.000 Einwohner<br><input type="checkbox"/> 10.001 - 20.000 Einwohner<br><input type="checkbox"/> 5.000 - 10.000 Einwohner<br><input type="checkbox"/> <5.000 Einwohner |                               |
| 43                               | Wie wichtig ist es dir bei der Wahl der Weiterbildungsstelle später als <u>angestellter Facharzt</u> übernommen werden zu können?                                        | <b>gar nicht wichtig</b> <span style="float: right;"><b>sehr wichtig</b></span><br><div style="display: flex; justify-content: space-around; align-items: center;"> <div>○</div> <div>○</div> <div>○</div> <div>○</div> <div>○</div> <div>○</div> <div>○</div> </div>  |                               |
| 44                               | Wie wichtig ist es dir bei der Wahl der Weiterbildungsstelle später als <u>Teilhaber</u> in die Praxis einsteigen zu können?                                             | <b>gar nicht wichtig</b> <span style="float: right;"><b>sehr wichtig</b></span><br><div style="display: flex; justify-content: space-around; align-items: center;"> <div>○</div> <div>○</div> <div>○</div> <div>○</div> <div>○</div> <div>○</div> <div>○</div> </div>  |                               |

| Teil 6 – Zukunftsplanung als Fachärztin/Facharzt für Allgemeinmedizin |                                                                                                       |                                                                                                                                                                                                                                                                        |
|-----------------------------------------------------------------------|-------------------------------------------------------------------------------------------------------|------------------------------------------------------------------------------------------------------------------------------------------------------------------------------------------------------------------------------------------------------------------------|
| Bitte beantworte folgende Fragen                                      |                                                                                                       | Bitte setze je Frage nur eine Markierung                                                                                                                                                                                                                               |
| 45                                                                    | In welchem (Bundes)Land möchtest du nach der Facharztprüfung leben?                                   | <i>Freitext (z.B. Bremen, aber auch Griechenland)</i>                                                                                                                                                                                                                  |
| 46                                                                    | Wie groß soll der Ort sein in welchem du in Zukunft <u>wohnen</u> möchtest?                           | <input type="checkbox"/> >100.000 Einwohner (Großstadt)<br><input type="checkbox"/> 20.001 - 100.000 Einwohner<br><input type="checkbox"/> 10.001 - 20.000 Einwohner<br><input type="checkbox"/> 5.000 - 10.000 Einwohner<br><input type="checkbox"/> <5.000 Einwohner |
| 47                                                                    | Wie weit soll dein zukünftiger Wohnort von der nächsten Großstadt (>100.000 Einwohner) entfernt sein? | <input type="checkbox"/> ich möchte innerhalb einer Großstadt leben<br><input type="checkbox"/> <10 Kilometer<br><input type="checkbox"/> 10-35 Kilometer<br><input type="checkbox"/> >35 Kilometer                                                                    |
| 48                                                                    | Wie wichtig ist es dir, dass sich der Ort deines Arbeitsplatzes von deinem Wohnort unterscheidet?     | <b>gar nicht</b> <span style="float: right;"><b>sehr</b></span><br><input type="radio"/> <input type="radio"/> <input type="radio"/> <input type="radio"/> <input type="radio"/> <input type="radio"/> <input type="radio"/>                                           |
| 49                                                                    | Wie groß soll der Ort sein in dem du <u>langfristig arbeiten</u> möchtest?                            | <input type="checkbox"/> >100.000 Einwohner (Großstadt)<br><input type="checkbox"/> 20.001 - 100.000 Einwohner<br><input type="checkbox"/> 10.001 - 20.000 Einwohner<br><input type="checkbox"/> 5.000 - 10.000 Einwohner<br><input type="checkbox"/> <5.000 Einwohner |
| 50                                                                    | Könntest du dir vorstellen in einer Landarztpraxis zu arbeiten?                                       | <input type="checkbox"/> nein<br><input type="checkbox"/> ja                                                                                                                                                                                                           |
| 50a                                                                   | Falls du dir vorstellen könntest in einer Landarztpraxis zu arbeiten, planst du dies?                 |                                                                                                                                                                                                                                                                        |
| 51                                                                    | Hast Du vor Zusatzbezeichnungen zu erwerben?                                                          | <input type="checkbox"/> nein<br><input type="checkbox"/> ja, und zwar folgende ( <i>Freitext</i> )                                                                                                                                                                    |

| Bitte beantworte folgende Fragen |                                                                                                                                                                          | Bitte setze je Frage nur eine Markierung                                                                                                                                                                                                                                                                                                                                                                                                            |
|----------------------------------|--------------------------------------------------------------------------------------------------------------------------------------------------------------------------|-----------------------------------------------------------------------------------------------------------------------------------------------------------------------------------------------------------------------------------------------------------------------------------------------------------------------------------------------------------------------------------------------------------------------------------------------------|
| 52                               | Wie möchtest du nach deiner Facharztprüfung hauptsächlich tätig sein?                                                                                                    | <input type="checkbox"/> hausärztlich<br><input type="checkbox"/> nicht hausärztlich                                                                                                                                                                                                                                                                                                                                                                |
| 53                               | Strebst Du eine Selbstständigkeit an?                                                                                                                                    | <input type="checkbox"/> ja, halben KV-Sitz<br><input type="checkbox"/> ja, vollen KV-Sitz<br><input type="checkbox"/> ja, Privatarzt (ohne KV-Zulassung)<br><input type="checkbox"/> unentschieden<br><br><input type="checkbox"/> nein, ich schließe eine Selbstständigkeit aus weil ( <i>Freitext Stichworte</i> )                                                                                                                               |
| Bitte beantworte folgende Frage  |                                                                                                                                                                          | <i>Mehrfachnennung möglich</i>                                                                                                                                                                                                                                                                                                                                                                                                                      |
| 54                               | Wo möchtest du nach deiner Facharztprüfung arbeiten?<br><br>Anmerkung für Mehrfachnennung:<br>Bitte gib nur mehrere Orte an, wenn du planst <u>parallel</u> zu arbeiten. | <input type="radio"/> Einzelpraxis<br><input type="radio"/> Berufsausübungsgemeinschaft<br><input type="radio"/> Praxisgemeinschaft<br><input type="radio"/> Medizinisches Versorgungszentrum<br><input type="radio"/> universitäre Forschungseinrichtung<br><input type="radio"/> Krankenhaus stationär<br><input type="radio"/> Krankenhaus Notfallambulanz<br><input type="radio"/> Industrie<br><input type="radio"/> sonstiges <i>Freitext</i> |

# Teil 7 – Abfrage Quereinstieg Allgemeinmedizin

NUR FÜR QUEREINSTEIGER<sup>1</sup>

| Bitte beantworte folgende Fragen |                                                                                    | Bitte setze je Frage nur eine Markierung                                                                                            |                                                                       |
|----------------------------------|------------------------------------------------------------------------------------|-------------------------------------------------------------------------------------------------------------------------------------|-----------------------------------------------------------------------|
| 55                               | Wann hast du deine erste Facharztprüfung abgelegt?                                 |                                                                                                                                     | Monat / Jahr<br>(z.B. 03/2010)                                        |
| 56                               | Welche Facharztbezeichnung(en) besitzt du?                                         | <i>Freitext (z.B. Anästhesie)</i>                                                                                                   |                                                                       |
| 57                               | Welche Zusatzbezeichnung(en) besitzt du?                                           | <input type="checkbox"/> keine<br><input type="checkbox"/> folgende <i>Freitext (z.B. Akupunktur)</i>                               |                                                                       |
| 58                               | Wie lange dauerte deine erste Weiterbildung insgesamt gedauert?                    |                                                                                                                                     | Bitte Zeitangabe in Jahren und Monaten<br>(z.B. 6 Jahre und 4 Monate) |
| 59                               | In welchem Umfang hast du in deinen ersten Facharzt <u>überwiegend</u> gearbeitet? | <input type="checkbox"/> 100%<br><input type="checkbox"/> 75-99%<br><input type="checkbox"/> 51-74%<br><input type="checkbox"/> 50% |                                                                       |
| 60                               | Wie lange warst du vor dem Quereinstieg <u>insgesamt</u> in Elternzeit?            |                                                                                                                                     | Zeitangabe in Monaten<br>(z.B. 18 + 22 = 40 Monate)                   |
| 61                               | Wann hast du den Quereinstieg Allgemeinmedizin begonnen?                           |                                                                                                                                     | Monat, Jahr<br>(z.B. 11/ 2015)                                        |
| 62                               | Wo hast du den Quereinstieg Allgemeinmedizin begonnen?                             | <input type="checkbox"/> Baden-Württemberg<br><input type="checkbox"/> anderes Bundesland ( <i>Freitext, z.B. Sachsen</i> )         |                                                                       |

<sup>1</sup> „Quereinsteiger“ sind Kolleginnen und Kollegen, die bereits einen Facharzt in einem anderen Fach **abgeschlossen** haben

## Kohortenstudie – Eingangsfragebogen

|                                                                                                                                      |                        |
|--------------------------------------------------------------------------------------------------------------------------------------|------------------------|
|                                                                                                                                      |                        |
| <p>Hast Du noch Anmerkungen oder Vorschläge für den Fragebogen?</p> <p>Wir sind für eure Verbesserungsvorschläge sehr dankbar! 😊</p> | <p><i>Freitext</i></p> |

**Vielen Dank für deine Teilnahme!**

Einen guten Start wünscht das Team der

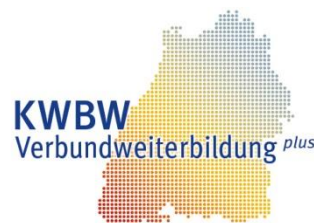

Supplement: MOESM1 [file 26186644]
